# Supplementary material for: Interacting layered hydroxide nanosheets with KF leading to Y/Eu hydroxyfluoride, oxyfluoride, and complex fluoride nanocrystals and investigation of photoluminescence
Source: Royal Society of Chemistry journal article supplement (doi:10.1039/c7ra10508h), 2017-01-01
Supplement: c7ra10508h1.pdf [file c7ra10508h1.pdf]

Supporting Information

**Interacting layered hydroxide nanosheets with KF leading to  
Y/Eu hydroxyfluoride, oxyfluoride, and complex fluoride  
nanocrystals and investigation of photoluminescence**

Jing Li,<sup>a,b,c</sup> Xuejiao Wang,<sup>\*,d</sup> Qi Zhu,<sup>a,b</sup> Byung-Nam Kim,<sup>c</sup> Xudong Sun,<sup>a,b,e</sup> Ji-Guang Li,<sup>\*,a,b,c</sup>

<sup>a</sup> Key Laboratory for Anisotropy and Texture of Materials (Ministry of Education), Northeastern University, Shenyang, Liaoning 110819, China

<sup>b</sup>Institute of Ceramics and Powder Metallurgy, School of Materials Science and Engineering, Northeastern University, Shenyang, Liaoning 110819, China

<sup>c</sup>Research Center for Functional Materials, National Institute for Materials Science, 1-1 Namiki, Tsukuba, Ibaraki 305-0044, Japan

<sup>d</sup>College of New energy, Bohai University, Jinzhou, Liaoning 121000, China

<sup>e</sup>Liaoning Engineering Laboratory of Special Optical Functional Crystals, College of Environment and Chemical Engineering, Dalian University, Dalian, Liaoning 116622, China

\*Corresponding author

Dr. Xuejiao Wang

Bohai University

E-mail: wangxuejiao@bhu.edu.cn

Dr. Ji-Guang Li

National Institute for Materials Science

E-mail: LI.Jiguang@nims.go.jp

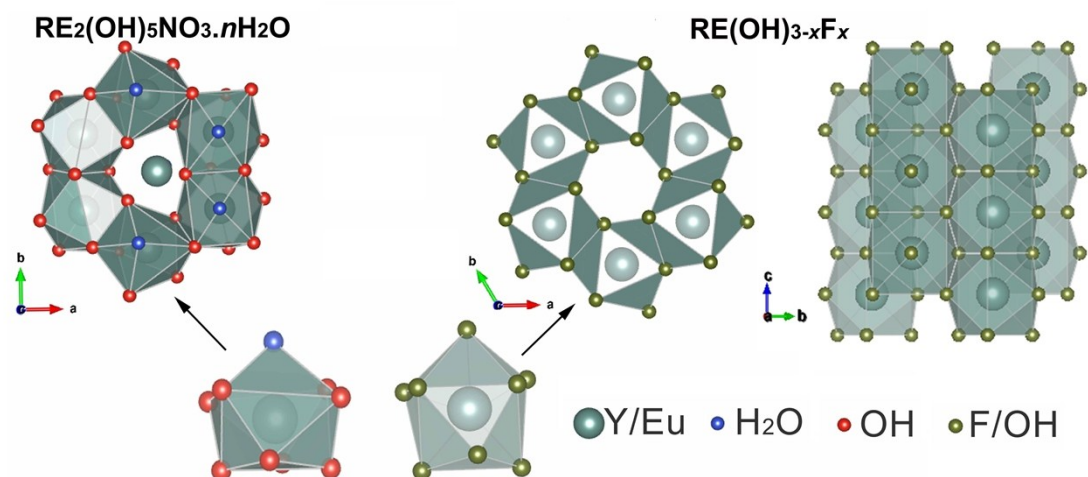

**Fig. S1** The crystal structure of RE<sub>2</sub>(OH)<sub>5</sub>NO<sub>3</sub>·nH<sub>2</sub>O and hexagonal RE(OH)<sub>3-x</sub>F<sub>x</sub> (realized with the Vesta software).

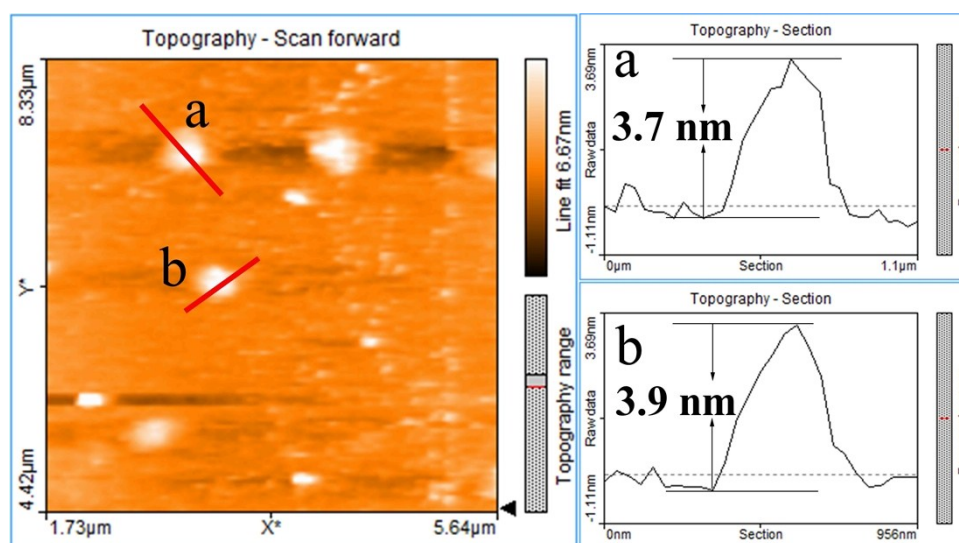

**Fig. S2** AFM image (left panel) and height profiles (right panel) of the LREH-NO<sub>3</sub><sup>-</sup> nanosheets. The height profiles were obtained along the red lines marked for the nanosheets in the AFM image, respectively.

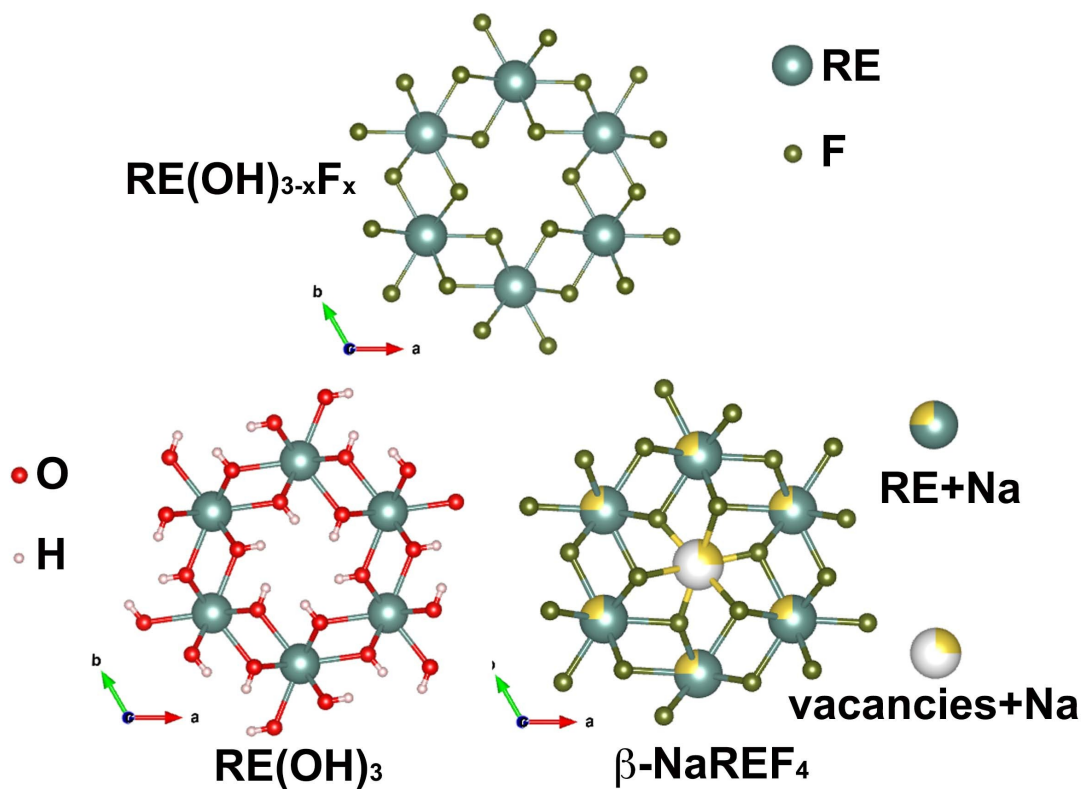

**Fig. S3** The crystal structure of  $\text{RE(OH)}_{3-x}\text{F}_x$ , hexagonal  $\text{RE(OH)}_3$ , and hexagonal  $\beta\text{-NaREF}_4$  (realized with the Vesta software).

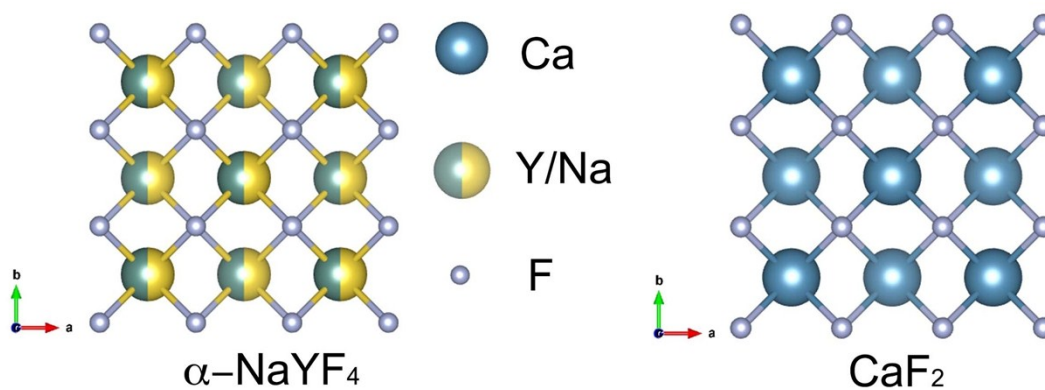

**Fig. S4** The crystal structure of  $\alpha\text{-NaREF}_4$  and  $\text{CaF}_2$  (realized with the Vesta software).

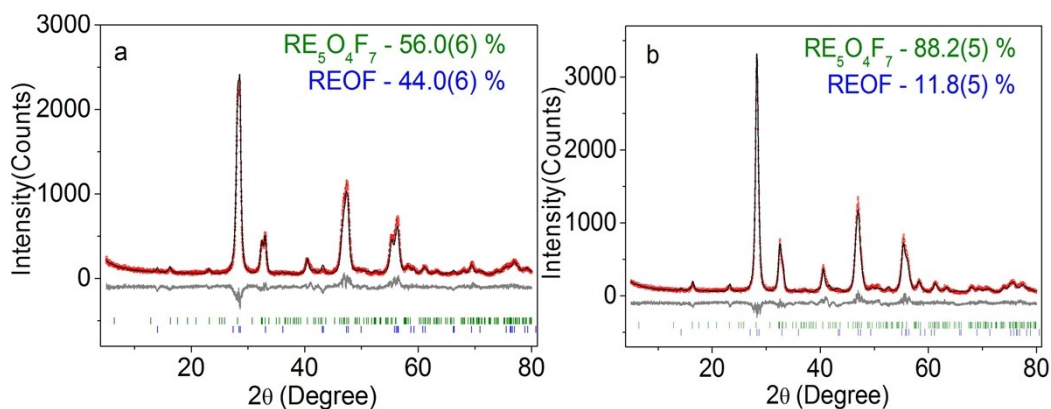

**Fig. S5** Rietveld fitting of the powder XRD patterns for the products obtained by calcining the  $\text{RE}(\text{OH})_{3-x}\text{F}_x$  of  $x=1.15$  (a,  $R=20:3$ ) and  $x=1.23$  (b,  $R=30:3$ ) in air at  $450^\circ\text{C}$  for 2 h. The derived phase constituents are included in the figures.

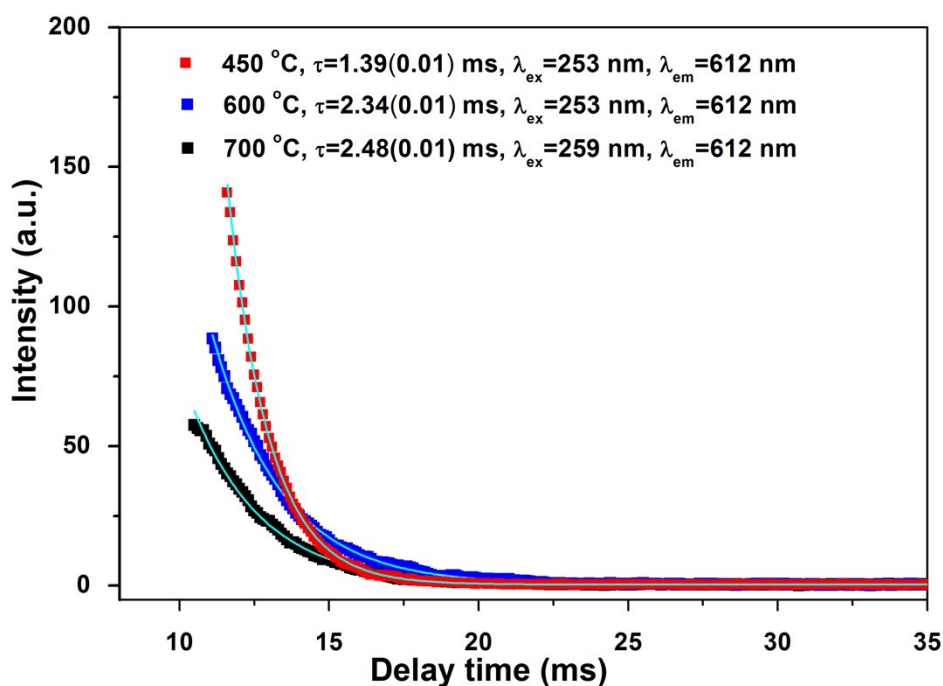

**Fig. S6** Fluorescence decay kinetics (scattered data) and the results of exponential fitting (solid lines) for the oxyfluoride phosphors calcined from  $\text{RE}(\text{OH})_{1.49}\text{F}_{1.51}$  ( $R=70:3$ ) in air the various temperatures indicated in the figure. The excitation and emission wavelengths used for measurements, the calcination temperature, and the derived lifetime ( $\tau$ ) values are included in the figure.
